# Supplementary material for: Racial and Ethnic Disparity in Approach for Pediatric Intensive Care Unit Research Participation
Source: PubMed Central journal article supplement (PMC11096993; doi:10.1001/jamanetworkopen.2024.11375), 2024-05-15
Supplement: jamanetwopen-e2411375-s002.pdf [file jamanetwopen-e2411375-s002.pdf]

## Data Sharing Statement

Mayer. Racial and Ethnic Disparity in Approach for Pediatric Intensive Care Unit Research Participation. *JAMA Netw Open*. Published May 15, 2024.

doi:10.1001/jamanetworkopen.2024.11375

### Data

**Data available:** Yes

**Data types:** Deidentified participant data

**How to access data:** Deidentified data upon request pursuant to regulations.

**When available:** With publication

### Supporting Documents

**Document types:** None

### Additional Information

**Who can access the data:** Qualified researchers

**Types of analyses:** re-analyses

**Mechanisms of data availability:** signed DUA
